# Supplementary material
Source: HighWire-hosted journal article supplement (https://thorax.bmj.com/content/thoraxjnl-2017-210440)
Supplement: inline-supplementary-material-1 [file inline-supplementary-material-1.pdf]

**Population-level impact of infant 10-valent pneumococcal conjugate vaccination on adult pneumonia hospitalisations, Finland**

**Revised Supplementary File**

**Supplementary Tabel 1. Pneumonia-Related Codes According to the International Classification of Diseases, 10<sup>th</sup> revision (ICD-10)**

| ICD-10 codes | Description                                           | ICD-10 codes | Description                                                 |
|--------------|-------------------------------------------------------|--------------|-------------------------------------------------------------|
| J13          | Pneumococcal pneumonia                                | J15.8        | Other bacterial pneumonia                                   |
| J10.0        | Influenza with pneumonia, influenza virus identified  | J15.7        | Pneumonia due to <i>Mycoplasma pneumoniae</i>               |
| J11.0        | Influenza with pneumonia, virus not identified        | J16.0        | Chlamydial pneumonia                                        |
| J12.0        | Pneumonia due to adenovirus                           | J16.8        | Pneumonia due to other specified infectious organisms       |
| J12.1        | Pneumonia due to respiratory syncytial virus          | J17.0        | Pneumonia in bacterial diseases classified elsewhere        |
| J12.2        | Pneumonia due to parainfluenza virus                  | J17.1        | Pneumonia in viral diseases classified elsewhere            |
| J12.8        | Pneumonia due to other virus not elsewhere classified | J17.2        | Pneumonia in mycoses                                        |
| J12.9        | Viral pneumonia, unspecified                          | J17.3        | Pneumonia in parasitic diseases                             |
| J14          | Pneumonia due to <i>Hemophilus influenzae</i>         | J17.8        | Pneumonia in other infectious diseases classified elsewhere |
| J15.0        | Pneumonia due to <i>Klebsiella pneumoniae</i>         | J15.9        | Bacterial pneumonia, unspecified                            |
| J15.1        | Pneumonia due to Pseudomonas                          | J18.0        | Bronchopneumonia, unspecified                               |
| J15.2        | Pneumonia due to Staphylococcus                       | J18.2        | Hypostatic pneumonia, unspecified                           |
| J15.3        | Pneumonia due to Streptococcus, group B               | J18.8        | Other pneumonia, organism unspecified                       |
| J15.4        | Pneumonia due to other Streptococci                   | J18.9        | Pneumonia, organism unspecified                             |
| J15.5        | Pneumonia due to Escherichia coli                     | J18.1        | Lobar pneumonia, unspecified                                |
| J15.6        | Pneumonia due to other aerobic Gram-negative bacteria | J86          | Empyema                                                     |

**Supplementary Table 2. Case Definitions**

| <b>Case definition</b>                    | <b>Description</b>                                                                                                                                                | <b>ICD-10 codes</b>                      |
|-------------------------------------------|-------------------------------------------------------------------------------------------------------------------------------------------------------------------|------------------------------------------|
| All-cause pneumonia hospitalisation*      | This definition includes hospitalised patients (at least overnight) who had pneumonia ICD-10 codes as primary discharge diagnoses.                                | J10-J18, J86                             |
| Pneumococcal pneumonia *                  | This includes patients who had pneumococcal pneumonia ICD-10 code - not restricted as the primary discharge diagnosis - who may or may not had been hospitalised. | J13                                      |
| Empyema*                                  | This includes patients who had empyema ICD-10 code - not restricted as the primary discharge diagnosis - who may or may not had been hospitalised.                | J86                                      |
| All-cause hospitalisation (control group) | This definition includes hospitalised patients (at least overnight) who had any ICD-10 code other than pneumonia-related codes.                                   | All ICD-10 codes except J10-J18, and J86 |

\*All care notifications within 90 days of the date of the first discharge notification (usually from ER) in the index pneumonia admission were combined into one episode.

Table 1. Trends in hospitalisations for Hospital Diagnosed Pneumonia\* in adults  $\geq 18$  years of age before and after Introduction of ten-valent pneumococcal conjugate vaccine (PCV10) in the national infant vaccination program, Finland

| Hospital Diagnosed Pneumonia* | Baseline Rate in 2004-05 (per 100,000 population) | Adjusted annual trends using interrupted time-series analysis |              |        |                                                        |              |        |
|-------------------------------|---------------------------------------------------|---------------------------------------------------------------|--------------|--------|--------------------------------------------------------|--------------|--------|
|                               |                                                   | Period before PCV10 (2004-05 to 2009-10 <sup>a</sup> )        |              |        | Period after PCV10, (2011-12 to 2014-15 <sup>a</sup> ) |              |        |
|                               |                                                   | Adjusted annual trend                                         |              |        | Adjusted annual trend                                  |              |        |
|                               |                                                   | IRR                                                           | 95% CI       | $p^b$  | IRR                                                    | 95% CI       | $p^b$  |
| Age (years)                   |                                                   |                                                               |              |        |                                                        |              |        |
| 18-49                         | 260.9                                             | 1.049                                                         | 1.037, 1.062 | <0.001 | 0.919                                                  | 0.886, 0.953 | <0.001 |
| 50-64                         | 544.0                                             | 1.062                                                         | 1.049, 1.067 | <0.001 | 0.919                                                  | 0.897, 0.942 | <0.001 |
| $\geq 65^c$                   | 2581.5                                            | 1.024                                                         | 1.012, 1.027 | <0.001 | 0.976                                                  | 0.965, 0.988 | <0.001 |
| 65-74                         | 1341.2                                            | 1.024                                                         | 1.012, 1.037 | <0.001 | 0.965                                                  | 0.942, 0.988 | 0.001  |
| 75-84                         | 3257.7                                            | 1.012                                                         | 1.011, 1.024 | <0.001 | 0.976                                                  | 0.965, 0.988 | 0.039  |
| $\geq 85$                     | 6703.9                                            | 1.024                                                         | 1.012, 1.024 | <0.001 | 0.976                                                  | 0.965, 1.004 | 0.111  |
| <b>Total<sup>c</sup></b>      | 804.2                                             | 1.037                                                         | 1.024, 1.037 | <0.001 | 0.953                                                  | 0.942, 0.965 | <0.001 |

\* This definition includes patients who had pneumonia ICD-10 codes J10-J18 and J86 - not restricted as the primary discharge diagnoses - who may or may not had been hospitalised. IRR: Incidence rate ratio. IRRs are adjusted for sex and seasonality, with the natural log of the population size as the offset variable. The IRR of the trend before-PCV10 is estimated as the change in annual hospitalisation rates in the years 2004-05 to 2009-10. The IRR of the trend after-PCV10 is estimated as the comparison of the annual trend in the years 2011-12 to 2013-14 to the trend in the period before. <sup>a</sup> PCV10 was introduced in the Finnish NVP in September 2010. The year 2010-11 was defined as a transitional period and was excluded from the analysis. <sup>b</sup> Two-tailed  $P$  value. <sup>c</sup> Analyses for the aggregate age-groups (i.e. the total  $\geq 18$  years of age] and the  $\geq 65$  years of age) were age-adjusted using the following age groups: all age groups in the analyses for the total, and the 65-74, 75-84, and  $\geq 85$  years of age in the analyses for the  $\geq 65$  years of age group.

Table 2. Estimated and expected hospitalisation rates of Hospital Diagnosed Pneumonia\* in adults ≥18 years of age, 2014-15

| Hospital Diagnosed Pneumonia*<br>Age (years) | Estimated rate per 100,000 population <sup>a</sup> | Expected rate per 100,000 population <sup>b</sup> | Expected versus estimated hospitalisation rates in 2014-15 |                                            |                       |
|----------------------------------------------|----------------------------------------------------|---------------------------------------------------|------------------------------------------------------------|--------------------------------------------|-----------------------|
|                                              |                                                    |                                                   | Rate difference per 100,000 population                     | 95% CI <sup>c</sup> per 100,000 population | Percent reduction (%) |
| 18-49                                        | 262.6                                              | 350.3                                             | 87.6                                                       | 71.1, 104.1                                | 25.0                  |
| 50-64                                        | 670.6                                              | 900.2                                             | 229.7                                                      | 202.3, 257.1                               | 25.5                  |
| ≥65                                          | 2936.9                                             | 3193.4                                            | 256.5                                                      | 219.5, 293.4                               | 8.0                   |
| 65-74                                        | 1523.1                                             | 1726.3                                            | 203.2                                                      | 163.9, 242.5                               | 11.8                  |
| 75-84                                        | 3622.9                                             | 3880.5                                            | 257.6                                                      | 187.9, 327.2                               | 6.6                   |
| ≥85                                          | 7739.0                                             | 8222.2                                            | 483.2                                                      | 312.0, 654.3                               | 5.9                   |
| <b>Total</b>                                 | 1041.5                                             | 1234.5                                            | 193.1                                                      | 173.1, 213.0                               | 15.6                  |

\*This definition includes patients who had pneumonia ICD-10 codes J10-J18 and J86 - not restricted as the primary discharge diagnoses - who may or may not have been hospitalised. <sup>a</sup> Estimated rate is the average hospitalisation rate estimated from the adjusted negative binomial regression model, which included as independent variables the time since the beginning of the study and time since the start of the intervention period. The year 2010-11 was considered a transitional period and excluded from the analysis. <sup>b</sup> Expected rate is the average hospitalisation rate estimated from the adjusted model with the time since the beginning of the study as the independent variable. <sup>c</sup> 95% Confidence Intervals are estimated using Delta method, and were considered significant if they did not include zero. <sup>d</sup> Analyses for the aggregate age-groups (i.e. the total [≥18 years of age] and the ≥65 years of age) were age-adjusted using the following age groups: all age groups in the analyses for the total, and the 65-74, 75-84, and ≥85 years of age in the analyses for the ≥65 years of age group.

**Supplementary Figure 1. Trend in all-cause hospitalisations in Adults  $\geq 18$  Years of Age, 2004-05 to 2014-15, Finland**

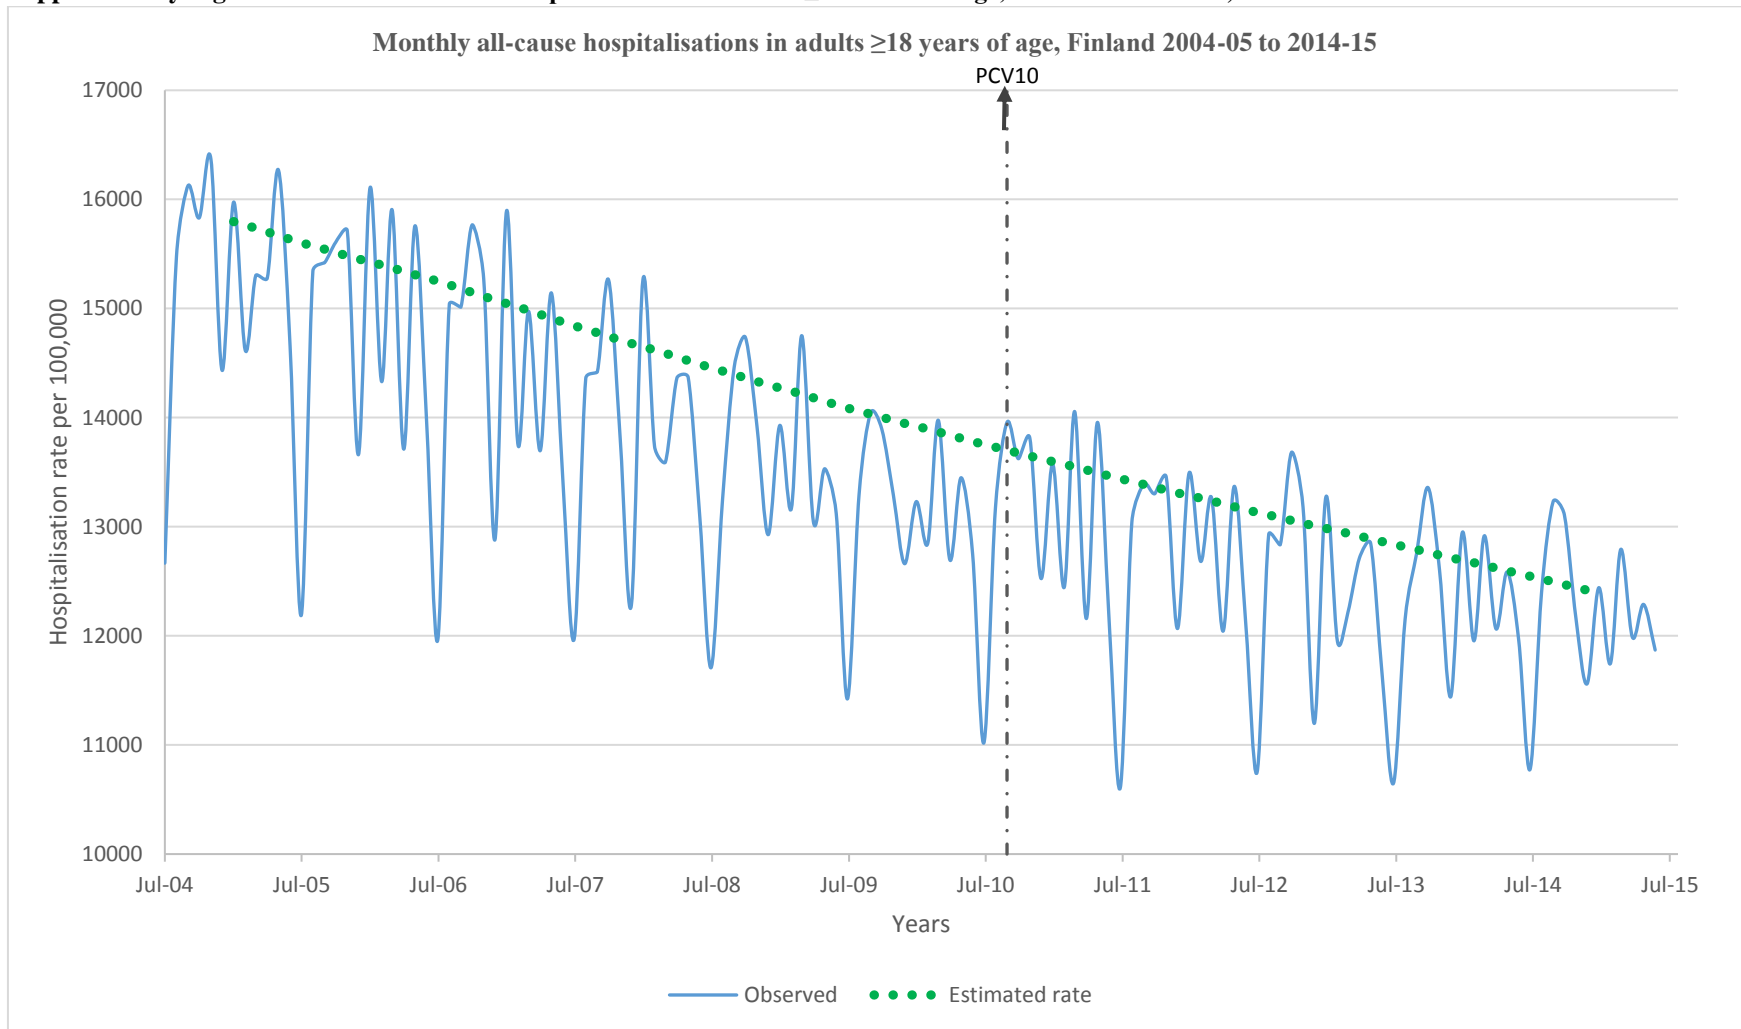

All-cause hospitalisations denote hospitalised patients (at least overnight) who had any ICD-10 codes other than J10-J18 and J86 as primary discharge diagnoses. PCV10: 10-valent pneumococcal conjugate vaccine. The black vertical dashed line marks the introduction of PCV10 in September 2010. The solid line represents the observed rate (i.e. unadjusted monthly hospitalisation rate). The green dots represent the rate estimated from the adjusted negative binomial regression model. 12-month moving average filter was applied to estimated rates.

**Supplementary Figure 2. Trend in all-cause pneumonia hospitalisations in adults  $\geq 18$  years of age, relative to the introduction of the guidelines for the management of community acquired pneumonia (CAP) in 2008, and the ten-valent pneumococcal conjugate vaccine (PCV10) in the National Vaccination Programme (NVP) in 2010, Finland**

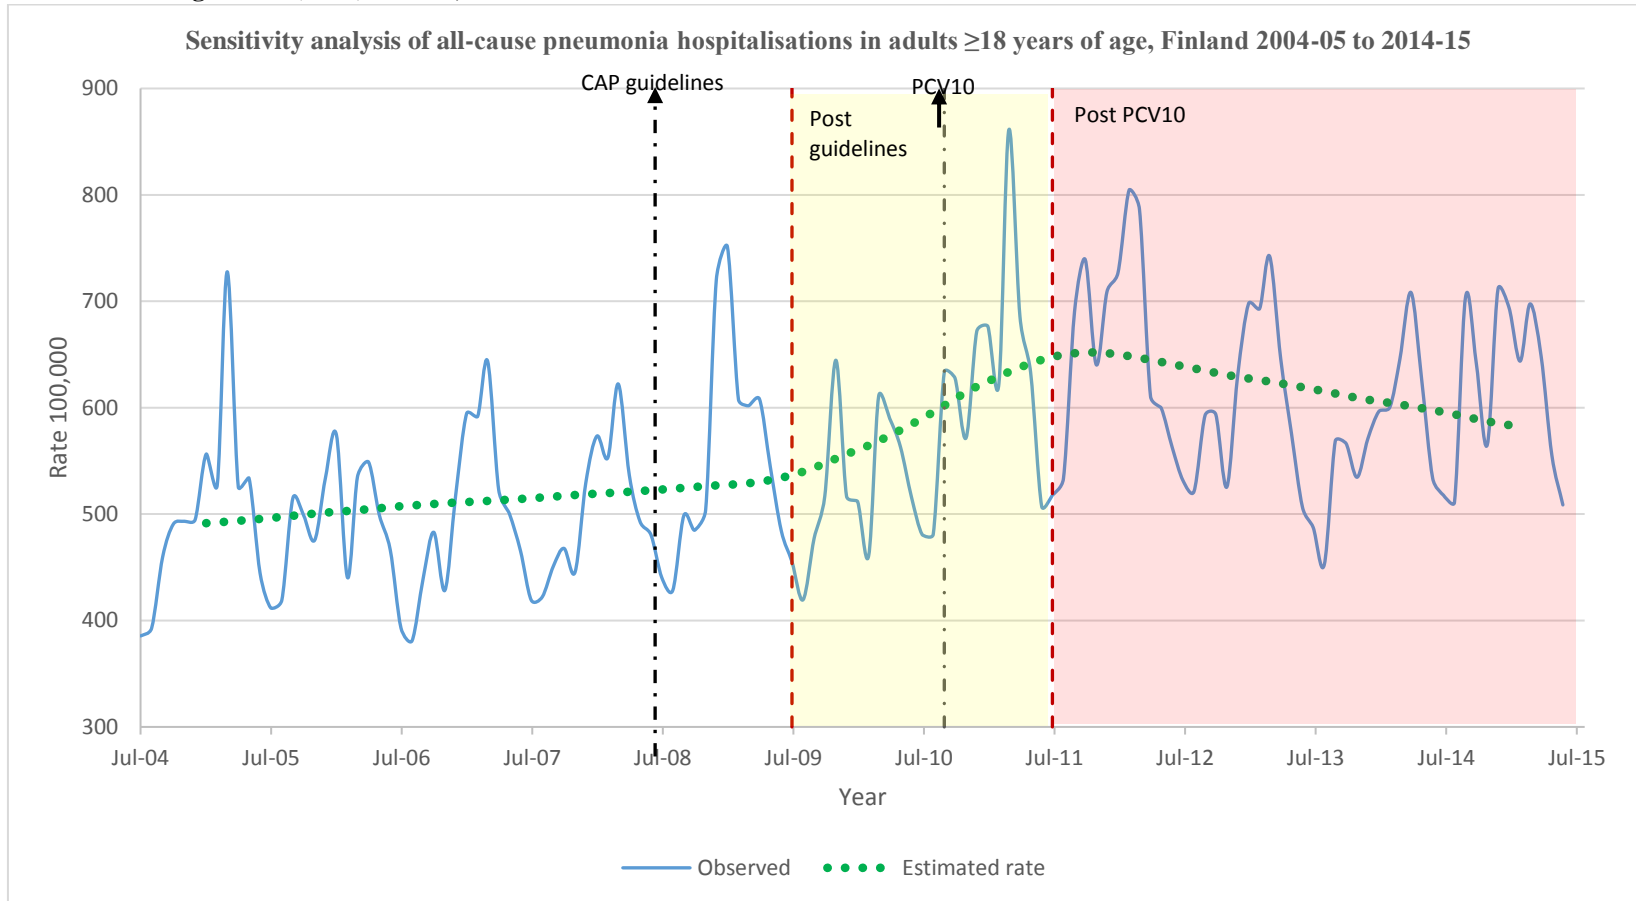

All-cause pneumonia hospitalisations denote hospitalised patients (at least overnight) who had any of the ICD-10 codes J10-J18, or J86 as primary discharge diagnoses. CAP: community acquired pneumonia. PCV10: 10-valent pneumococcal conjugate vaccine. The black vertical dash-dot lines mark the introduction of the Finnish guidelines for the management of CAP and PCV10 in the National Vaccination Programme in mid-2008 and September 2010, respectively. The red vertical dash lines mark the start of the period following the two interventions. The solid line represents the observed rate (i.e. unadjusted monthly hospitalisation rate). The green dots represent the rate estimated from the adjusted negative binomial regression model. 12-month moving average filter was applied to the estimated rate.
